# Supplementary material for: Weighted gene co-expression network analysis of the salt-responsive transcriptomes reveals novel hub genes in green halophytic microalgae Dunaliella salina
Source: PubMed Central journal article supplement (PMC7810892; doi:10.1038/s41598-020-80945-3), 2021-01-15
Supplement: 41598_2020_80945_MOESM1_ESM.pdf [file 41598_2020_80945_MOESM1_ESM.pdf]

## **Weighted Gene Co-Expression Network Analysis of the Salt-Responsive Transcriptomes Reveals Novel Hub Genes in Green Halophytic Microalgae *Dunaliella salina***

Bahman Panahi<sup>1\*</sup>, Mohammad Amin Hejazi<sup>2</sup>

1-Department of Genomics, Branch for Northwest & West region, Agricultural Biotechnology Research Institute of Iran (ABRII), Agricultural Research, Education and Extension Organization (AREEO), Tabriz 5156915-598, Iran

2-Department of Food Biotechnology, Branch for Northwest & West region, Agricultural Biotechnology Research Institute of Iran (ABRII), Agricultural Research, Education and Extension Organization (AREEO), Tabriz 5156915-598, Iran

### **Supplementary File S1: Python program to extract the geneID from the blastX result**

```
#!/usr/bin/python

# Usage get_geneID.py <blast output file>

# Python program to extract the geneID from the blastX result

import sys

def get_geneid():

    inFile = open(sys.argv[1], 'r')

    outFile = open("geneID.txt", 'w')

    outer_query = False

    inner_query = False

    first_newline = False

    tophit = False

    dt_name = ""

    for line in inFile.readlines():

        if outer_query == True and inner_query == True:
```

```
if first_newline == True:
    if tophit == True:
        outer_query = False
        inner_query = False
        first_newline = False
        tophit = False
        continue
    else:
        geneid = line.split()[0].split('|')[3]
        outFile.write(dt_name + '\t' + geneid + '\n')
        tophit = True
elif line == '\n' and first_newline == False:
    first_newline = True

elif outer_query == True and 'Sequences producing significant alignments' in line:
    inner_query = True
elif 'Query=' in line:
    dt_name = line.strip().split()[-1]
    outer_query = True

inFile.close()
outFile.close()

if __name__ == '__main__':
    if len(sys.argv) < 2:
```

```
print 'Invalid arguments!\n'
```

```
sys.exit(0)
```

```
get_geneid()
```

```
print 'I am DONE. Please check the output. :)
```
